# Supplementary material for: GORAB scaffolds COPI at the trans-Golgi for efficient enzyme recycling and correct protein glycosylation
Source: PubMed Central journal article supplement (PMC6328613; doi:10.1038/s41467-018-08044-6), 2019-01-10
Supplement: 41467_2018_8044_MOESM1_ESM.pdf [file 41467_2018_8044_MOESM1_ESM.pdf]

**Supplementary Information for**

**GORAB scaffolds COPI at the *trans*-Golgi for efficient enzyme recycling and correct protein glycosylation**

Witkos et al

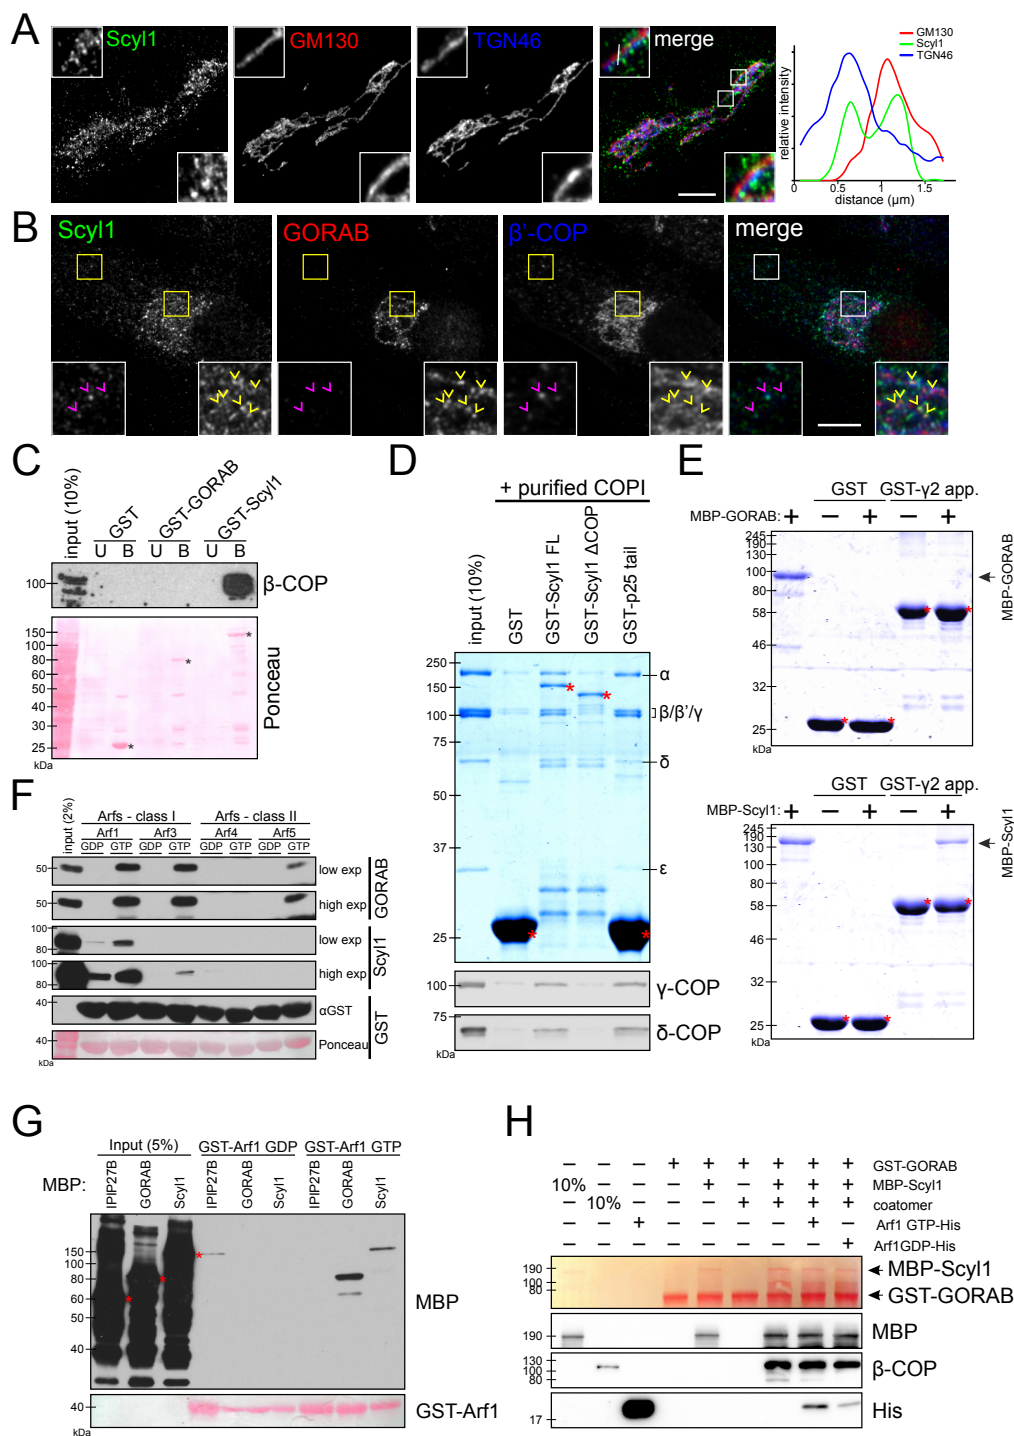

**Supplementary Figure 1. Scyl1 localization and GORAB/Scyl1 binding to coatomer and Arf.** **A.** Scyl1 localization in the Golgi. Human dermal fibroblasts were fixed and labeled with antibodies against Scyl1, GM130 and TGN46. Scale bar, 10 μm. The white line indicates the pixels used for the RGB fluorescence intensity profile plot depicted on the right, and is representative of n=20 cells. **B.** Co-localization analysis of GORAB, Scyl1 and β'-COP. Human dermal fibroblasts were fixed and labeled with antibodies against Scyl1, GORAB and β'-COP. Scale bar, 10 μm. Yellow arrowheads mark GORAB puncta co-localizing both with Scyl1 and β'-COP, magenta arrowheads mark GORAB puncta co-localizing with Scyl1 only. **C.** Pull-down using purified GST, GST-GORAB, GST-Scyl1 as bait and sHeLa lysate. Input (I, 5%), unbound (U, 50%), and bound fractions (B, 50%) were blotted for the β-COP subunit of coatomer. GST-tagged proteins were visualized by staining with Ponceau S and bands representing GST-tagged bait proteins are marked with asterisks. **D.** Pull-down using purified GST, GST-Scyl1 FL, GST-Scyl1ΔCOP and GST-p25 tail as bait and purified recombinant coatomer as prey. Samples were subjected to SDS-PAGE and stained with Coomassie Blue or blotted for γ-COP and δ-COP. GST-tagged bait proteins are marked with asterisks. **E.** In vitro binding assay between purified GST and GST-γ-2 appendage domain, and MBP-GORAB and MBP-Scyl1. Samples were subjected to SDS-PAGE and stained with Coomassie Blue. GST-tagged bait proteins are marked with asterisks. **F.** Pull-down using purified GST-Δ14Arf1 (GDP-T31N; GTP-Q71L), GST-Δ14Arf4 (GDP-T31N; GTP-Q71L) and sHeLa cell lysate. Samples, input (2%) and bound fractions (50%), were blotted for GORAB, Scyl1 and GST. **G.** An in vitro binding using purified GST-Δ14Arf1 and MBP-IPI27B, MBP-GORAB and MBP-Scyl1. Samples, input (2%), bound fractions (50%), were blotted for MBP and GST-Arf1 was visualized by staining with Ponceau S. Full-length MBP-tagged proteins in the inputs are marked with asterisks. **H.** In vitro binding assay between purified GST-GORAB, MBP-Scyl1, recombinant coatomer and Arf1 (GDP-T31N; GTP-Q71L)-His. Samples were blotted for MBP, β-COP and His. GST-GORAB and MBP-Scyl1 were visualized by staining with Ponceau S.



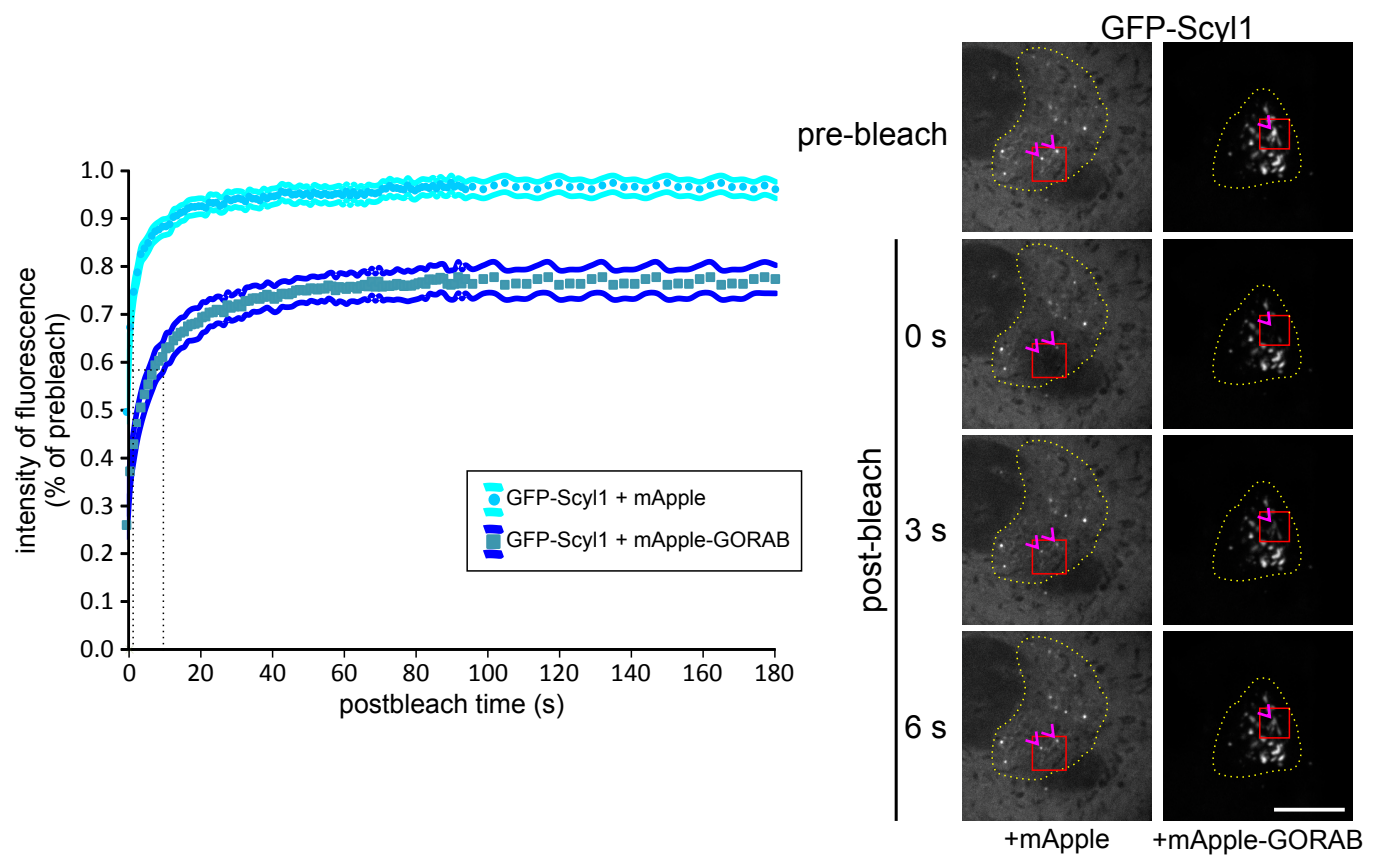

**Supplementary Figure 2. FRAP analysis of Scyl1 dynamics.** Fluorescence recovery after photobleaching. Left, FRAP recovery curves for GFP-Scyl1 in cells co-expressing mApple or mApple-GORAB. Means with SEM for GFP-Scyl1 co-expressed with mApple (n = 43 cells) and GFP-Scyl1 co-expressed with mApple-GORAB (n = 37 cells). Dotted lines mark points of half-time recoveries. Right, representative HeLaM GFP-Scyl1 co-expressing mApple or mApple-GORAB cells at pre-bleached and selected post-bleached states. Dotted yellow line marks the Golgi area, bleached region of interests are marked with red boxes and GFP-Scyl1 structures are labeled with magenta arrowheads. Scale bar, 10  $\mu$ m.

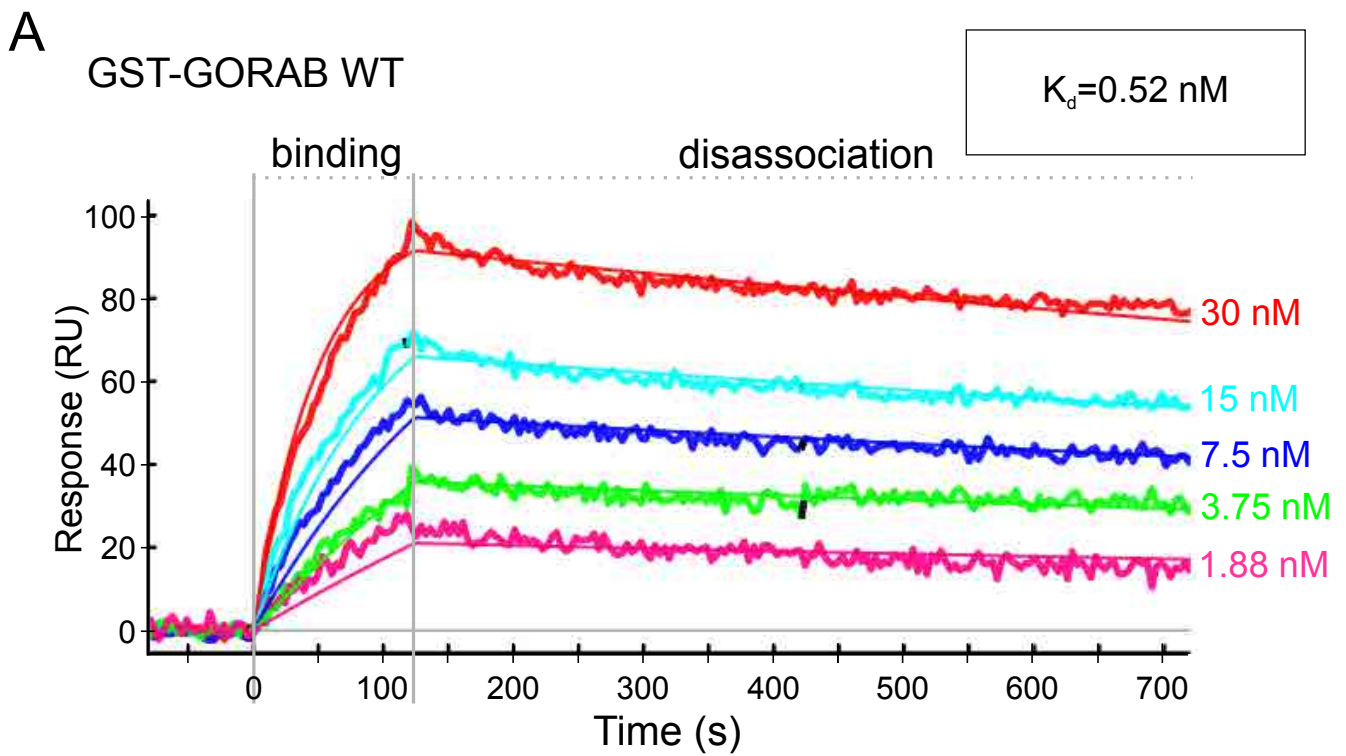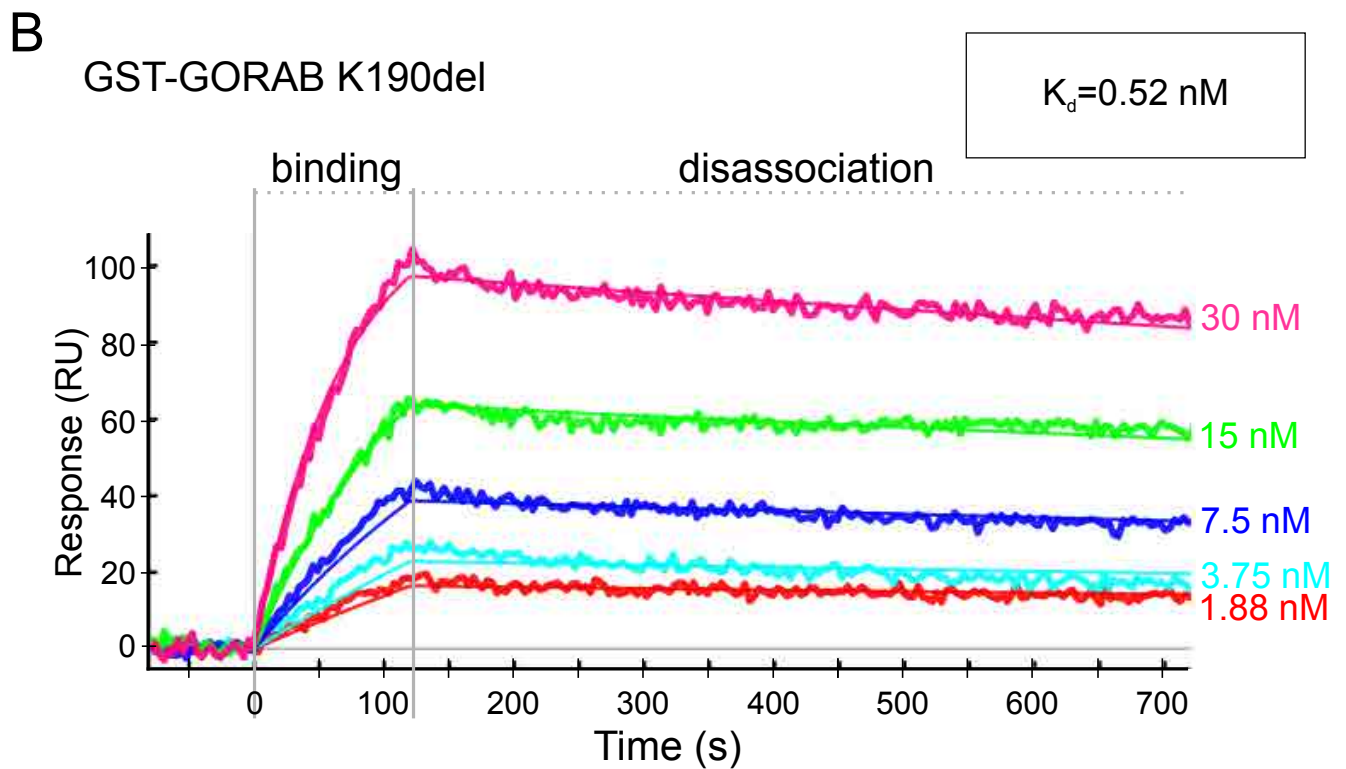

**Supplementary Figure 3. SPR measurement of GORAB-Scyl1 binding.** Binding of GST-GORAB WT (A) and K190del (B) variants to MBP-Scyl1 attached to the GLH sensor chip via cross-linked anti-MBP antibody using surface plasma resonance. Binding took place for 120 s followed by 600 s disassociation phase. Concentrations of analyte (GST-tagged GORAB) during the binding phase are indicated on the right. Similar results were obtained in three separate experiments, which allowed determination of the  $K_d$  (top right corner).

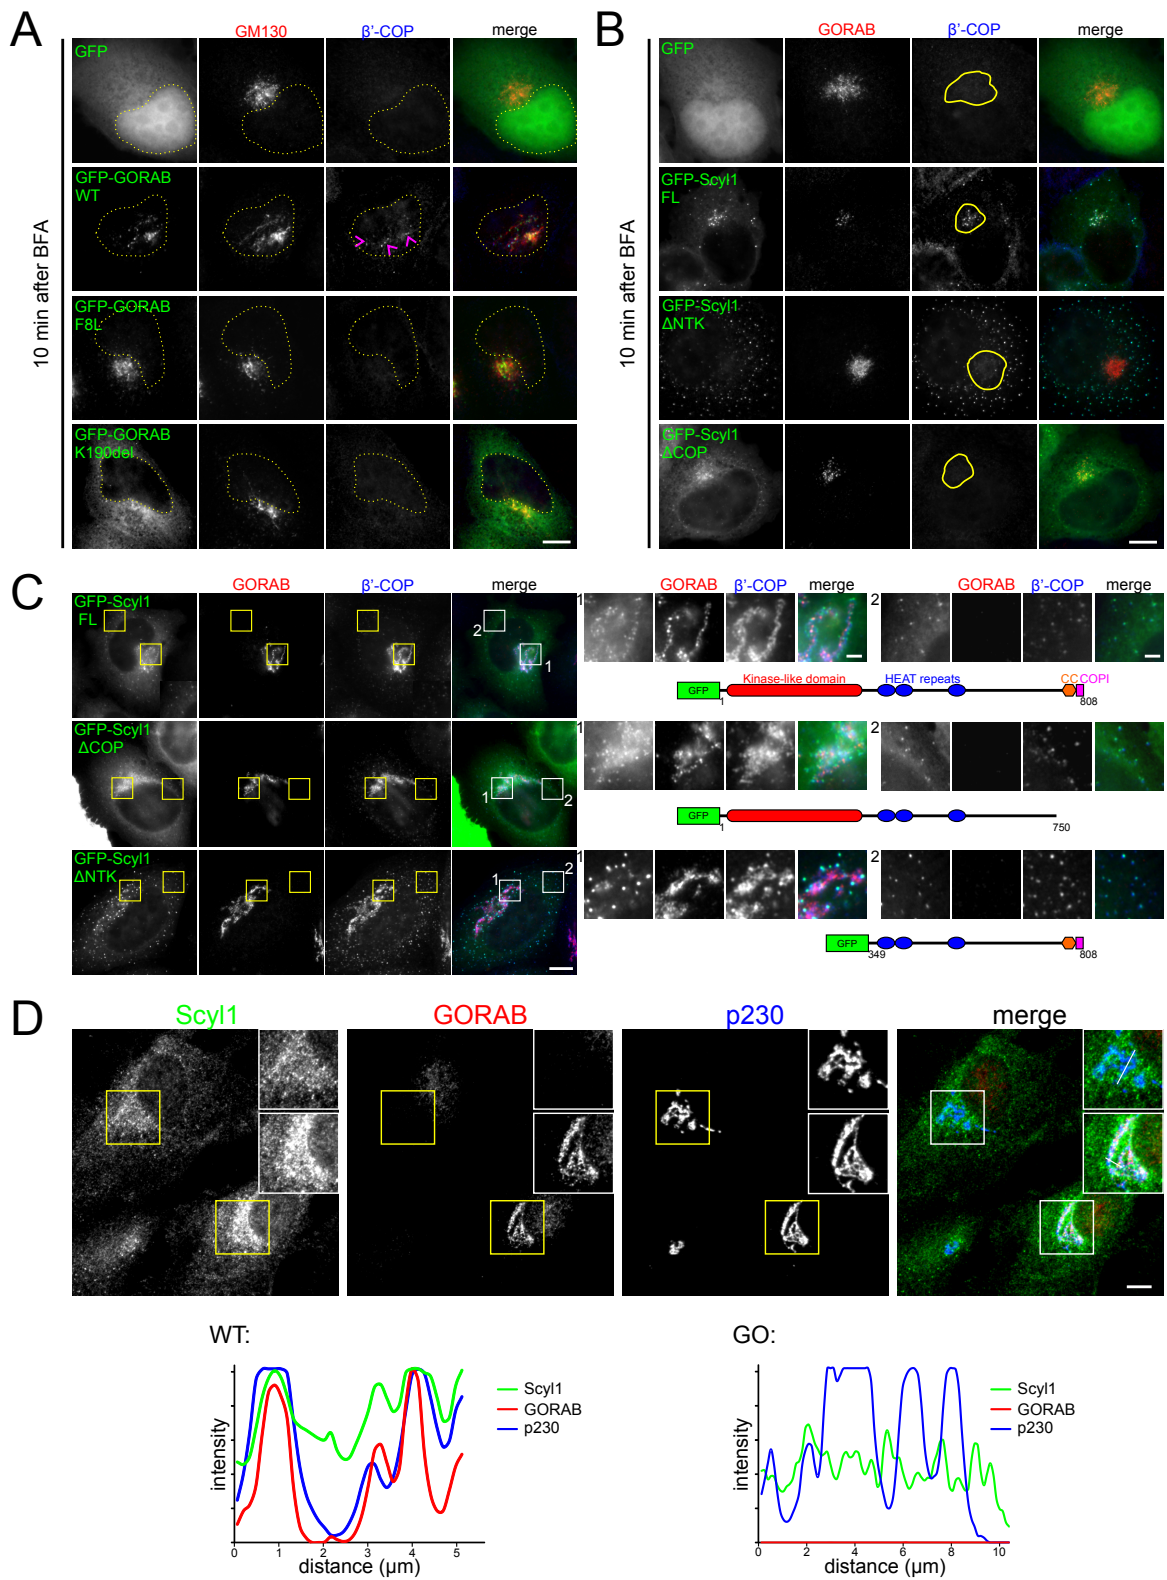

**Supplementary Figure 4. Stabilization of coat protein binding at the Golgi and ERGIC by GORAB and Scyl1 variants.** A. Effects of GFP-GORAB variants on Golgi retention of COPI in BFA-treated cells. HeLaM cells were transiently transfected with GFP or GFP-GORAB variants and exposed to 5  $\mu$ g/mL BFA for 10 min prior to fixation. Cells were labeled with antibodies to GM130 and  $\beta'$ -COP. Scale bar, 10  $\mu$ m. Dotted line marks the position of the nucleus and  $\beta'$ -COP positive structures in the Golgi are marked with magenta arrowheads. B. Effects of GFP-Scyl1 truncation constructs on Golgi retention of COPI in BFA-treated cells. HeLaM cells were transiently transfected with GFP or GFP-Scyl1 truncation constructs and exposed to 5  $\mu$ g/mL BFA for 10 min prior to fixation. Cells were labeled with antibodies to GM130 and  $\beta'$ -COP. Scale bar, 10  $\mu$ m. The peri-Golgi area is marked by a solid yellow line. C. Subcellular localization of GFP-tagged Scyl1 truncated constructs in untreated cells. HeLaM cells transiently expressing GFP-tagged Scyl1 truncation constructs were fixed and labeled with antibodies to GORAB and  $\beta'$ -COP. Scale bar, 10  $\mu$ m. Insets show magnifications of the regions boxed on the left and schematic depictions of the corresponding deletion constructs. . Scale bar, 2  $\mu$ m. D. Subcellular localization of Scyl1 in WT and GO fibroblasts. Cells were fixed and labeled with antibodies to GORAB and p230. Scale bar, 10  $\mu$ m. The white lines in the insets indicate the pixels used for the RGB fluorescence intensity profile plots shown underneath, and are representative of n=20 cells.

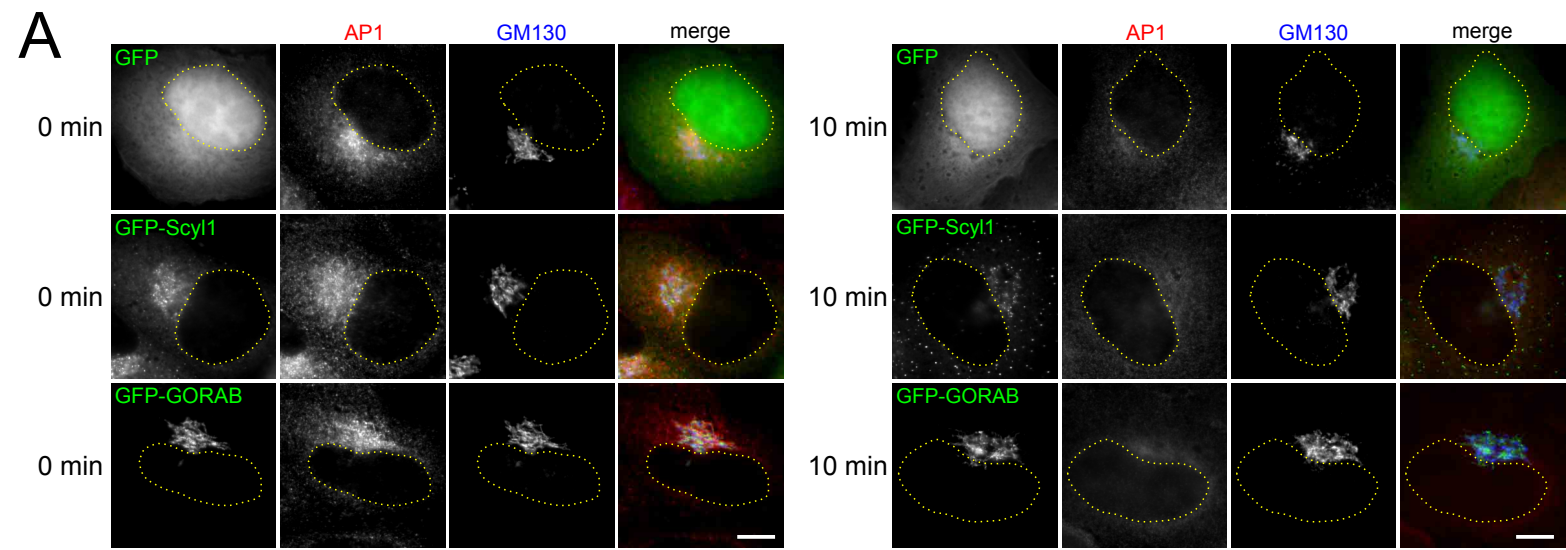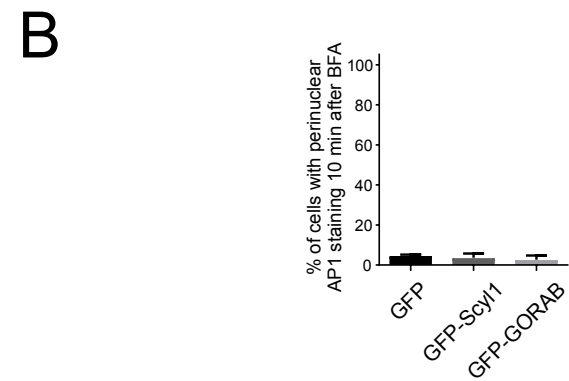

**Supplementary Figure 5. AP1 membrane association is not affected by GORAB or Scyl1.** A. AP1 subcellular localization in HeLaM cells transfected with GFP, GFP-GORAB or GFP-Scyl1 constructs and treated with 5  $\mu\text{g}/\text{mL}$  BFA for 10 min. Cells were labeled with antibodies to AP1 and GM130. Scale bar, 10  $\mu\text{m}$ . B. Quantification of HeLaM cells with AP1 retention in the peri-Golgi area following, 10 min incubation with 5  $\mu\text{g}/\text{mL}$  BFA. Error bars represent mean  $\pm$  SD, n=100 cells in each of 3 independent experiments, unpaired t-test.



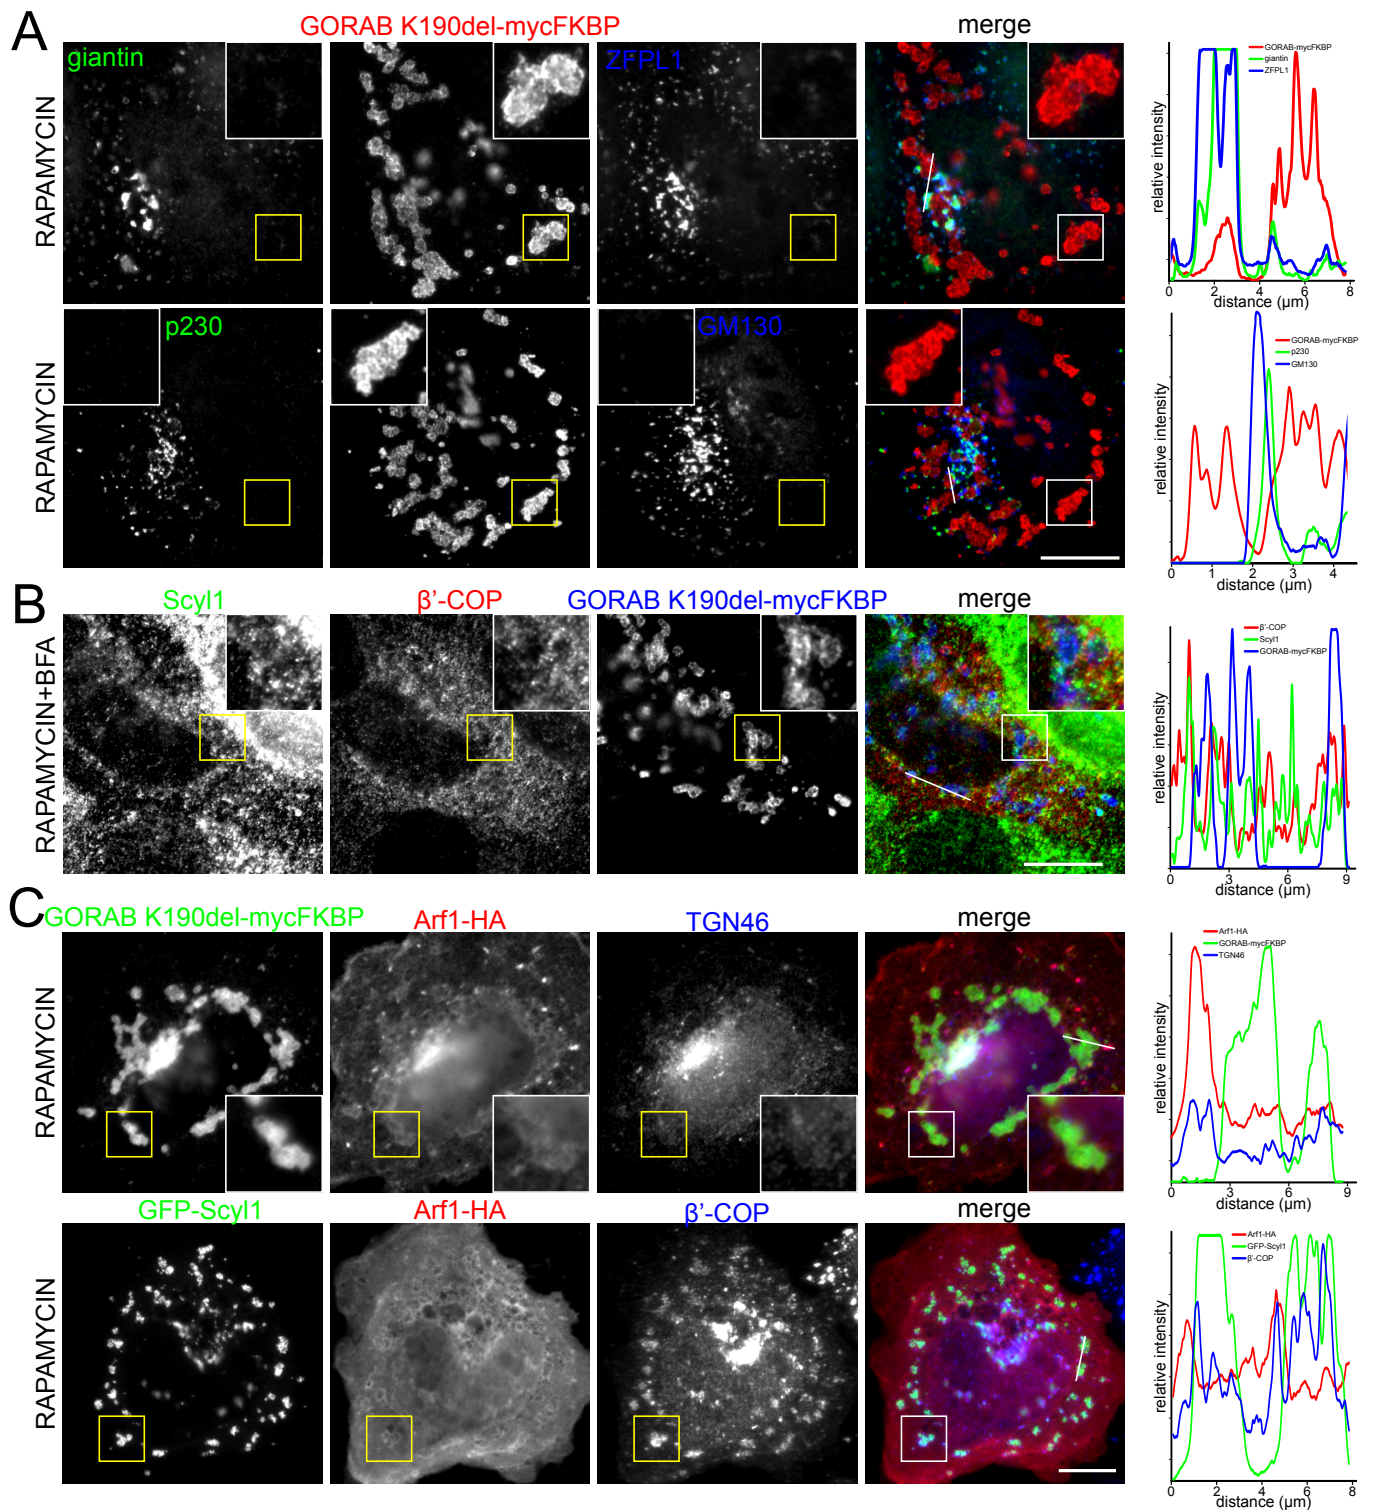

**Supplementary Figure 6. Mitochondrial relocation assay for Golgi markers, Scyl1 and Arf1.** A. HeLaM cells co-transfected with mito-FRB and GORABK190del-mycFKBP constructs were pretreated with 2.5  $\mu\text{g}/\text{mL}$  nocodazole for 2 h and further incubated with 1  $\mu\text{M}$  rapamycin or DMSO for 3 h prior to fixation. Cells were labeled with antibodies to the Golgi markers giantin, ZFPL1, p230 and GM130. B. HeLaM cells co-transfected with mito-FRB and GORABK190del-mycFKBP and treated as described in A were labeled with antibodies to myc and endogenous Scyl1 and  $\beta'$ -COP. C. HeLaM cells co-transfected with mito-FRB and GORABK190del-mycFKBP and treated as described in A were labeled with antibodies to myc, HA and the Golgi marker TGN46 (top row) or  $\beta'$ -COP (bottom row). Scale bars, 10  $\mu\text{m}$ . The white lines indicate pixels used for the RGB fluorescence intensity profile plots shown on the right, and are representative of  $n=20$  cells.

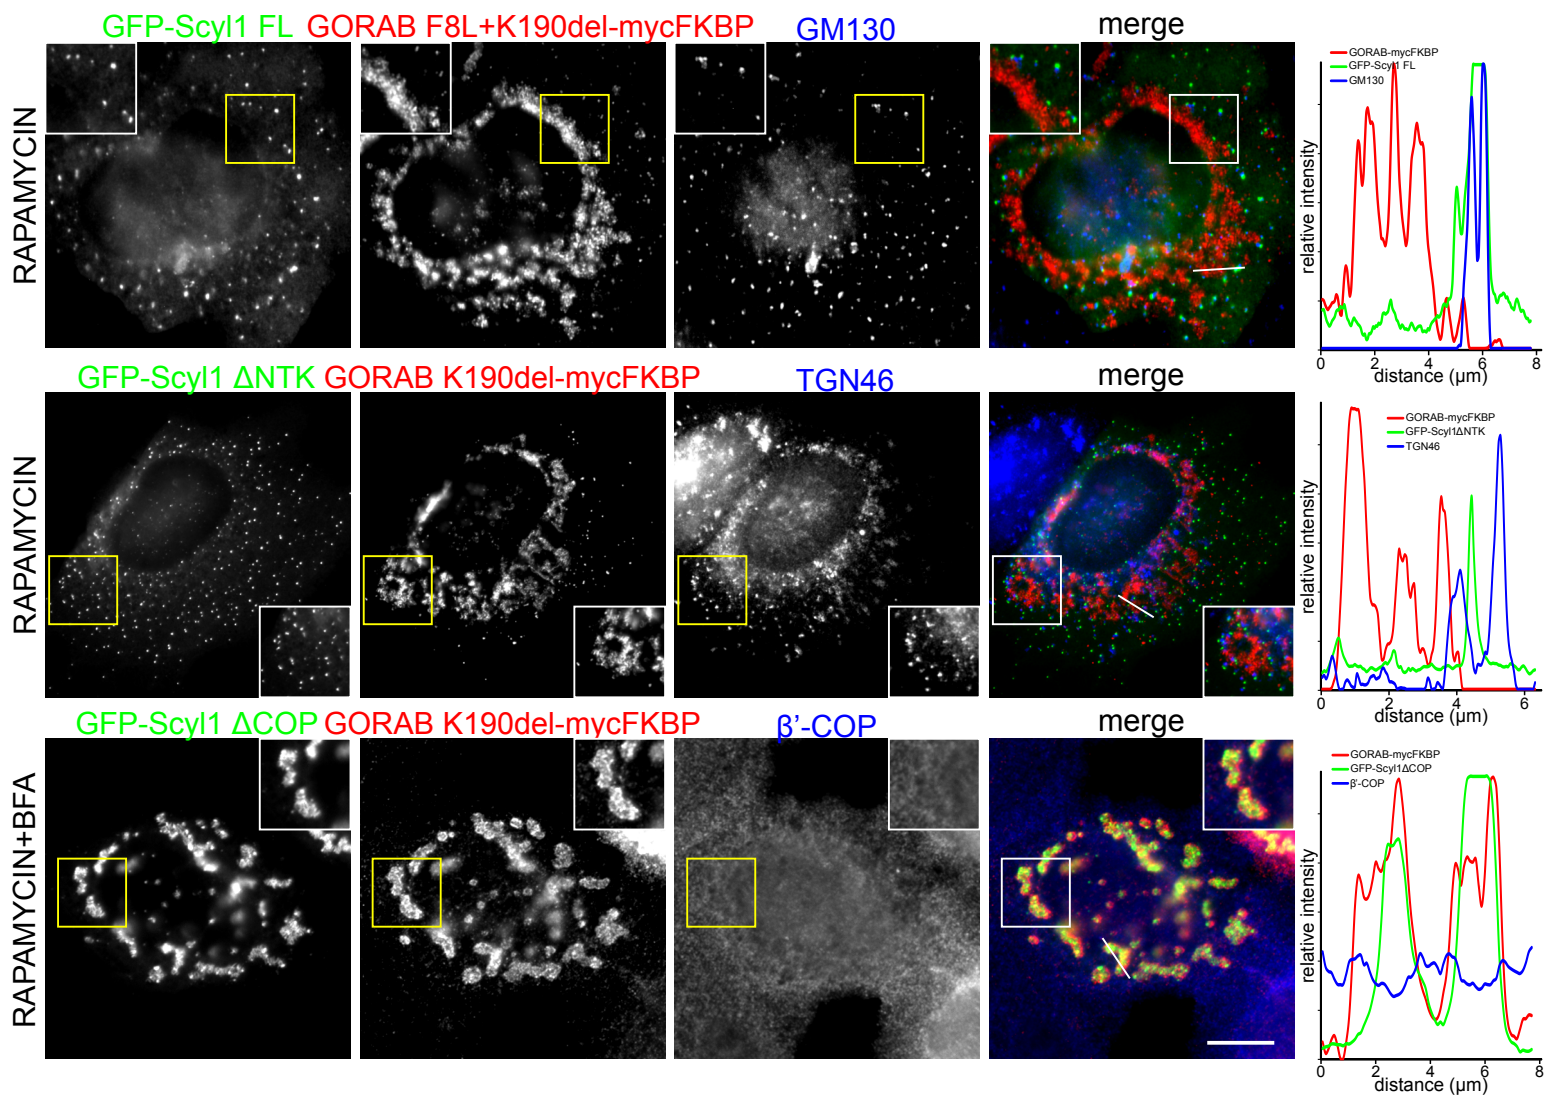

**Supplementary Figure 7. Mitochondrial relocation of COPI requires Scyl1 binding to GORAB and COPI.**

HeLaM cells co-transfected with mito-FRB, GORABK190del-mycFKBP or GORABF8L+K190del-mycFKBP and GFP-Scyl1 constructs were pretreated with 2.5 μg/mL nocodazole for 2 h and further incubated with 1 μM rapamycin for 3 h without (upper 2 rows) or with incubation with 5 μg/mL BFA for 15 min (bottom row) prior to fixation. Cells were labeled with antibodies to myc, GM130, TGN46 or β'-COP as indicated. Scale bar, 10 μm. The white line indicates the pixels used for the RGB fluorescence intensity profile plots depicted on the right



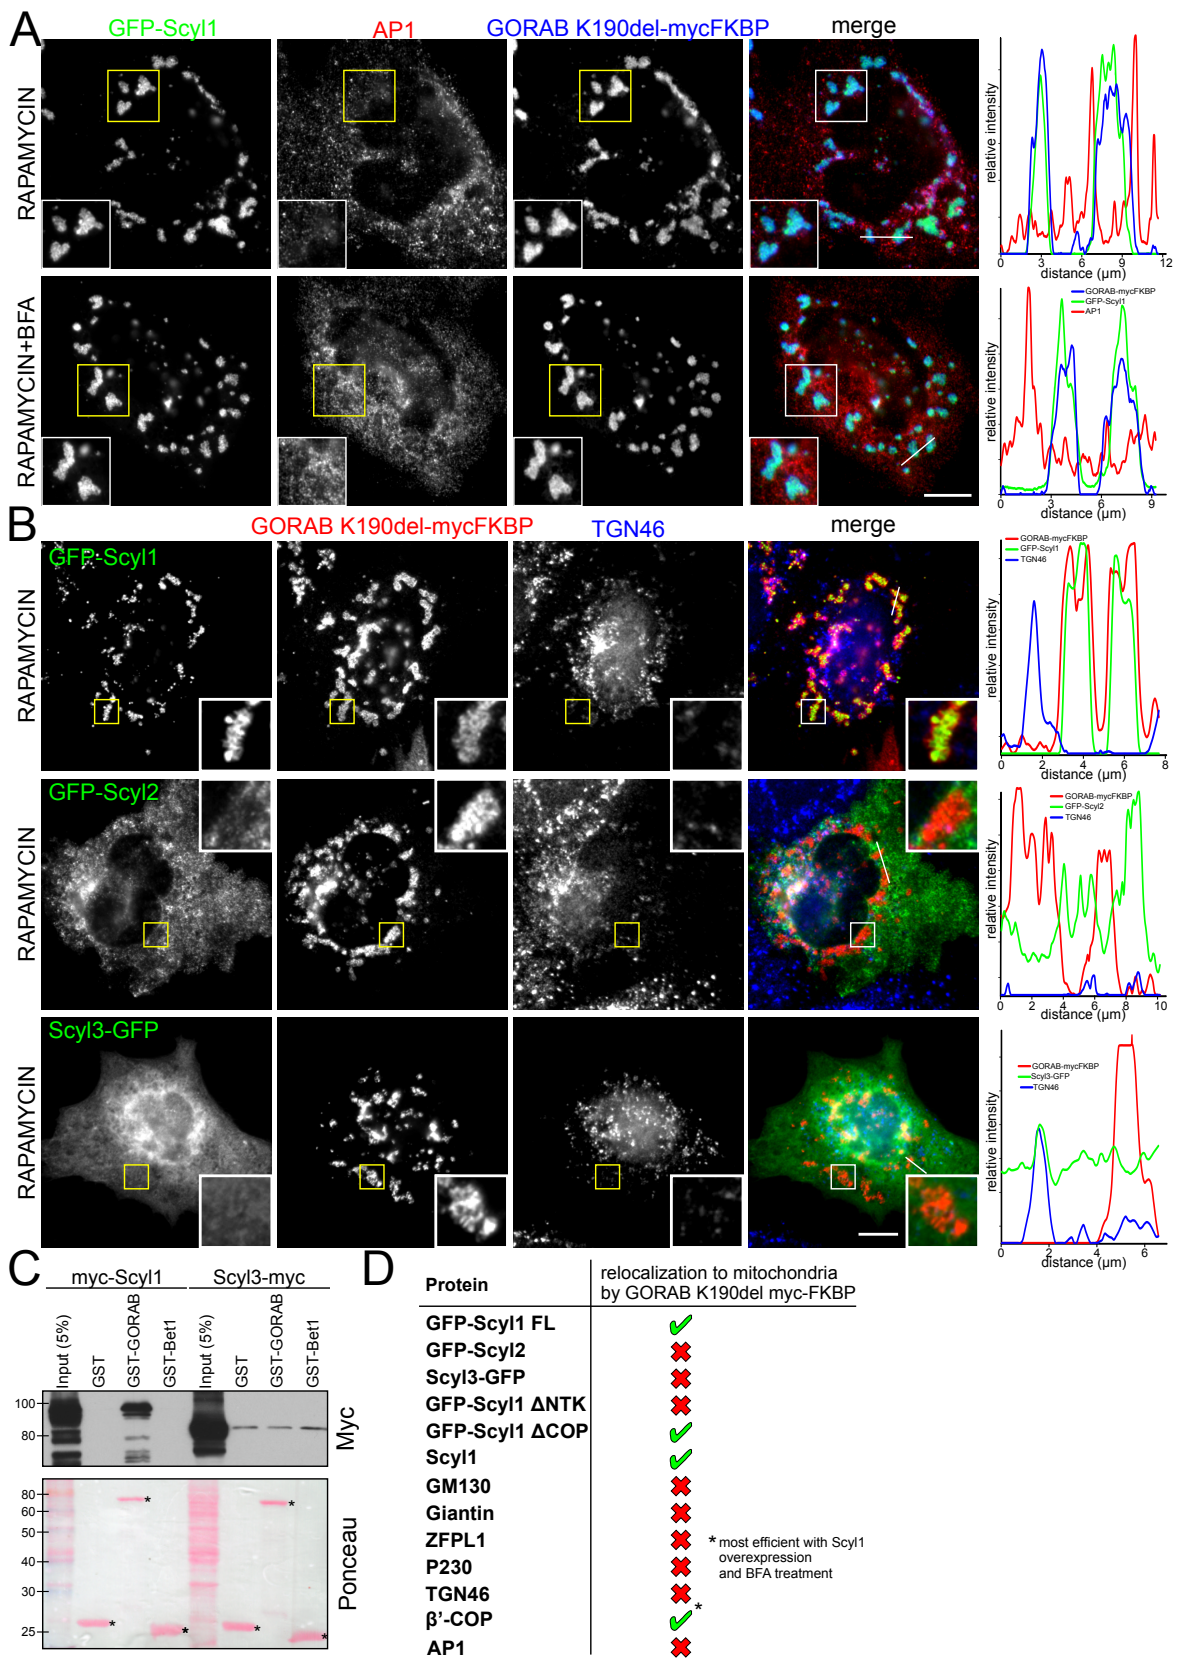

**Supplementary Figure 8. Mitochondrial relocation assay for AP1 and Scyl1.** HeLaM cells co-transfected with mito-FRB, GORABK190del-mycFKBP and GFP-Scyl1 constructs were pretreated with 2.5  $\mu\text{g}/\text{mL}$  nocodazole for 2 h and further incubated with 1  $\mu\text{M}$  rapamycin for 3 h without (top row) or with incubation with 5  $\mu\text{g}/\text{mL}$  BFA for 15 min (bottom row) prior to fixation. Cells were labeled with antibodies to AP1 and myc. B. HeLaM cells were co-transfected with mito-FRB, GORABK190del-mycFKBP and GFP-Scyl1, GFP-Scyl2 or Scyl3-GFP, treated as described in A and labeled with antibodies to myc and the Golgi marker TGN46. In panels A-B, scale bars are 10  $\mu\text{m}$  and white lines indicate the pixels used for the RGB fluorescence intensity profile plots shown on the right, and are representative of  $n=20$  cells. C. Pull-down using purified GST, GST-GORAB or GST-Bet1 as bait and lysate from HeLaM cells transiently expressing myc-Scyl1 and Scyl3-myc. Samples were subjected to SDS-PAGE and stained with Coomassie Blue or blotted for myc. GST-tagged bait proteins are marked with asterisks. D. A table summarizing mitochondrial recruitment experiments with GORABK190del-mycFKBP.

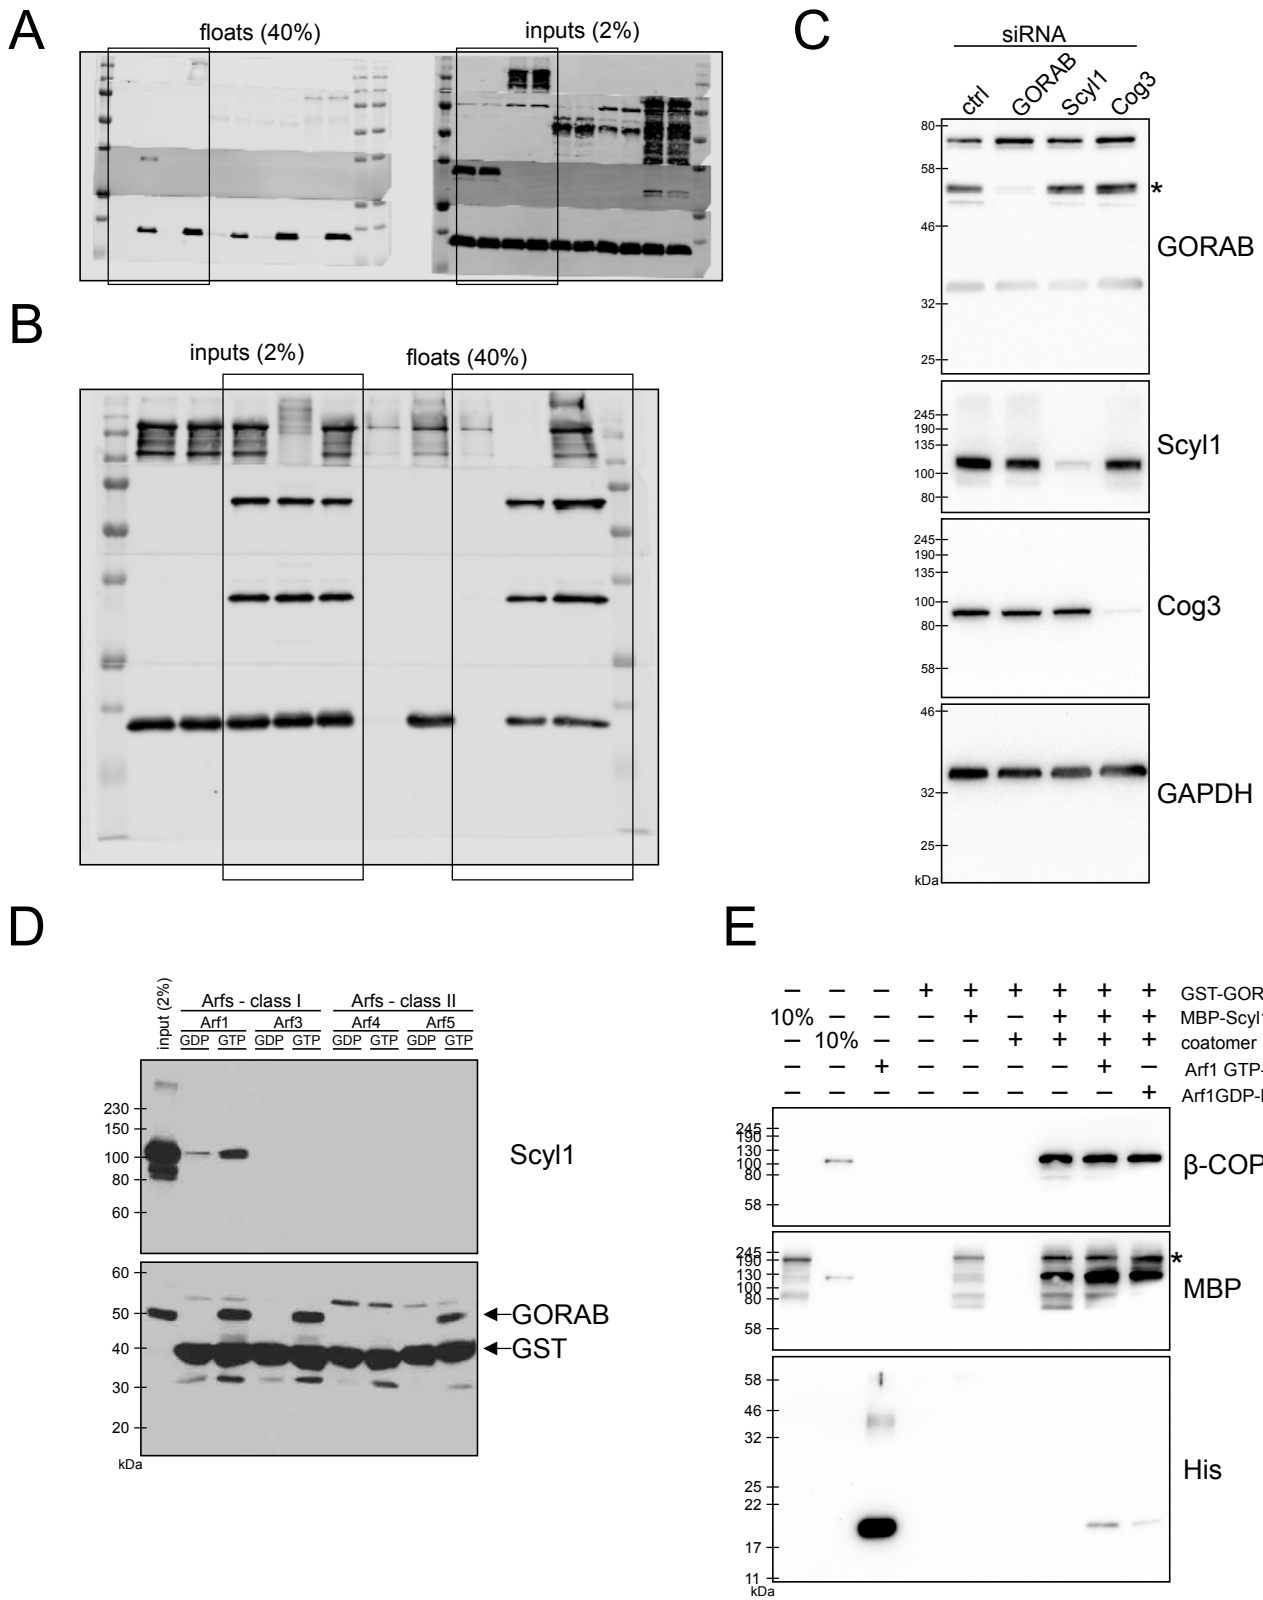

**Supplementary Figure 9. Uncropped blots.** A. Raw data from Fig 6A. B. Raw data from Fig 6B C. Raw data from Fig 8A. D. Raw data from Fig S1F. E. Raw data from Fig S1H.

**Supplementary Table 1. Assignment of N-glycan structures in the N-glycome analysis.** Shown are the glycan assignments for control and *Gorab*<sup>Null</sup> mouse skin tissue (Figure 7G).

| Calculated (m/z) | Measured (m/z) | Mass accuracies (ppm) | Assignment                                                                                                    | Type <sup>1</sup> |
|------------------|----------------|-----------------------|---------------------------------------------------------------------------------------------------------------|-------------------|
| 1141,5724        | 1141.5704      | 1.7                   | Fuc <sub>1</sub> Hex <sub>2</sub> HexNAC <sub>2</sub> + Na <sup>+</sup>                                       | DP                |
| 1171,5830        | 1171.5840      | 0.8                   | Hex <sub>3</sub> HexNAC <sub>2</sub> + Na <sup>+</sup>                                                        | DP                |
| 1345,6722        | 1345.6737      | 1.1                   | Fuc <sub>1</sub> Hex <sub>3</sub> HexNAC <sub>2</sub> + Na <sup>+</sup>                                       | DP                |
| 1375,6828        | 1375.6807      | 1,5                   | Hex <sub>4</sub> HexNAC <sub>2</sub> + Na <sup>+</sup>                                                        | DP                |
| 1416,7093        | 1416.7048      | 3,1                   | Hex <sub>3</sub> HexNAC <sub>3</sub> + Na <sup>+</sup>                                                        | C                 |
| 1579,7826        | 1579.7861      | 2,2                   | Hex <sub>5</sub> HexNAC <sub>2</sub> + Na <sup>+</sup>                                                        | O                 |
| 1620,8091        | 1620.8146      | 3,4                   | Hex <sub>4</sub> HexNAC <sub>3</sub> + Na <sup>+</sup>                                                        | C                 |
| 1661,8357        | 1661.8384      | 1,6                   | Hex <sub>3</sub> HexNAC <sub>4</sub> + Na <sup>+</sup>                                                        | C                 |
| 1783,8823        | 1783.8852      | 1,6                   | Hex <sub>6</sub> HexNAC <sub>2</sub> + Na <sup>+</sup>                                                        | O                 |
| 1835,9249        | 1835.9289      | 2,1                   | Fuc <sub>1</sub> Hex <sub>3</sub> HexNAC <sub>4</sub> + Na <sup>+</sup>                                       | C                 |
| 1865,9354        | 1865.9395      | 2,2                   | Hex <sub>4</sub> HexNAC <sub>4</sub> + Na <sup>+</sup>                                                        | C                 |
| 1906,9620        | 1906.9666      | 2,4                   | Hex <sub>3</sub> HexNAC <sub>5</sub> + Na <sup>+</sup>                                                        | C                 |
| 1987,9821        | 1987.9776      | 2,2                   | Hex <sub>7</sub> HexNAC <sub>2</sub> + Na <sup>+</sup>                                                        | O                 |
| 2040,0246        | 2040.0326      | 3,9                   | Fuc <sub>1</sub> Hex <sub>4</sub> HexNAC <sub>4</sub> + Na <sup>+</sup>                                       | C                 |
| 2070,0352        | 2070,0469      | 5,6                   | Hex <sub>5</sub> HexNAC <sub>4</sub> + Na <sup>+</sup>                                                        | C                 |
| 2192,0819        | 2192.0938      | 5,4                   | Hex <sub>8</sub> HexNAC <sub>2</sub> + Na <sup>+</sup>                                                        | O                 |
| 2244,1244        | 2244.1295      | 2,2                   | Fuc <sub>1</sub> Hex <sub>5</sub> HexNAC <sub>4</sub> + Na <sup>+</sup>                                       | C                 |
| 2285,1510        | 2285.1567      | 2,5                   | Fuc <sub>1</sub> Hex <sub>4</sub> HexNAC <sub>5</sub> + Na <sup>+</sup>                                       | C                 |
| 2396,1816        | 2396,1765      | 2,1                   | Hex <sub>9</sub> HexNAC <sub>2</sub> + Na <sup>+</sup>                                                        | O                 |
| 2431,2089        | 2431,2148      | 2,4                   | NeuAc <sub>1</sub> Hex <sub>5</sub> HexNAC <sub>4</sub> + Na <sup>+</sup>                                     | C                 |
| 2448,2242        | 2448,2183      | 2,4                   | Fuc <sub>1</sub> Hex <sub>6</sub> HexNAC <sub>4</sub> + Na <sup>+</sup>                                       | C                 |
| 2489,2507        | 2489,2385      | 4,9                   | Fuc <sub>1</sub> Hex <sub>5</sub> HexNAC <sub>5</sub> + Na <sup>+</sup>                                       | C                 |
| 2605,2981        | 2605,3016      | 1,3                   | NeuAc <sub>1</sub> Fuc <sub>1</sub> Hex <sub>5</sub> HexNAC <sub>4</sub> + Na <sup>+</sup>                    | C                 |
| 2635,3087        | 2635,3043      | 1,6                   | NeuGc <sub>1</sub> Fuc <sub>1</sub> Hex <sub>5</sub> HexNAC <sub>4</sub> + Na <sup>+</sup>                    | C                 |
| 2652,3240        | 2652,3116      | 4,6                   | Fuc <sub>1</sub> Hex <sub>7</sub> HexNAC <sub>4</sub> + Na <sup>+</sup>                                       | C                 |
| 2792,3825        | 2792,3757      | 2,4                   | NeuAc <sub>2</sub> Hex <sub>5</sub> HexNAC <sub>4</sub> + Na <sup>+</sup>                                     | C                 |
| 2809,3978        | 2809,3842      | 4,8                   | NeuAc <sub>1</sub> Fuc <sub>1</sub> Hex <sub>6</sub> HexNAC <sub>4</sub> + Na <sup>+</sup>                    | C                 |
| 2822,3840        | 2822,3901      | 2,1                   | NeuAc <sub>1</sub> NeuGc <sub>1</sub> Hex <sub>5</sub> HexNAC <sub>4</sub> + Na <sup>+</sup>                  | C                 |
| 2852,4037        | 2852,4189      | 5,3                   | NeuGc <sub>2</sub> Hex <sub>5</sub> HexNAC <sub>4</sub> + Na <sup>+</sup>                                     | C                 |
| 2966,4717        | 2966,4785      | 2,3                   | NeuAc <sub>2</sub> Fuc <sub>1</sub> Hex <sub>5</sub> HexNAC <sub>4</sub> + Na <sup>+</sup>                    | C                 |
| 2996,4824        | 2996,4929      | 3,5                   | NeuAc <sub>1</sub> NeuGc <sub>1</sub> Fuc <sub>1</sub> Hex <sub>5</sub> HexNAC <sub>4</sub> + Na <sup>+</sup> | C                 |
| 3026,4929        | 3026,4997      | 2,2                   | NeuGc <sub>2</sub> Fuc <sub>1</sub> Hex <sub>5</sub> HexNAC <sub>4</sub> + Na <sup>+</sup>                    | C                 |
| 3271,6193        | 3271,6262      | 2,1                   | NeuAc <sub>1</sub> NeuGc <sub>1</sub> Hex <sub>6</sub> HexNAC <sub>5</sub> + Na <sup>+</sup>                  | C                 |

<sup>1</sup> Glycans were grouped as oligomannose (O), hybrid (H), complex (C) and degradation product (DP - small glycans that are not produced by the mammalian N-glycosylation machinery and therefore most likely originate from lysosomal degradation)

**Supplementary Table 2. List of primary antibodies used in this study.**

| <b>Antigen</b>    | <b>Species</b> | <b>Dilution<sup>1</sup></b> | <b>Name/source of antibody</b>                                                                                                   |
|-------------------|----------------|-----------------------------|----------------------------------------------------------------------------------------------------------------------------------|
| TGN46             | sheep          | 1:200                       | Dr. Sreenivasan Ponnambalam, University of Leeds, Leeds, United Kingdom                                                          |
| Scyl1             | rabbit         | IF: 1:100,<br>WB: 1:500     | Dr. Gustav Lienhard, Dartmouth Medical School, NH <sup>1</sup>                                                                   |
| P230              | mouse          | IF 1:50,<br>WB: 1:500       | BD Biosciences (611281; Clone 15)                                                                                                |
| $\alpha$ -tubulin | mouse          | 1:1 000                     | Dr. Keith Gull, University of Oxford, Oxford, United Kingdom                                                                     |
| GFP               | mouse          | 1:1 000                     | Thermo Fisher Scientific (MA5-15256; GF28R)                                                                                      |
| GFP               | sheep          | 1:1 000                     | <sup>2</sup>                                                                                                                     |
| GM130             | mouse          | 1:500                       | BD Biosciences (610823; Clone 35)                                                                                                |
| GM130             | rabbit         | 1:500                       | Anti-N73pep <sup>3</sup>                                                                                                         |
| $\beta$ -COP      | mouse          | 1:1 000                     | EAGE <sup>4</sup>                                                                                                                |
| $\beta'$ -COP     | mouse          | 1:200                       | CMIA10 <sup>5</sup>                                                                                                              |
| $\gamma$ 1/2-COP  | rabbit         | 1:1 000                     | $\gamma$ 1R, <sup>6</sup>                                                                                                        |
| $\delta$ -COP     | rabbit         | 1:1 000                     | 877 <sup>7</sup>                                                                                                                 |
| $\epsilon$ -COP   | rabbit         | 1:1 000                     | <sup>8</sup>                                                                                                                     |
| Arf1              | rabbit         | 1:1 000                     | C1 <sup>9</sup>                                                                                                                  |
| MBP               | mouse          | 1:10 000                    | New England Biolabs (E8032)                                                                                                      |
| GAPDH             | mouse          | 1:4 000                     | Santa Cruz (sc-365062; G-9)                                                                                                      |
| GST               | sheep          | 1:10 000                    | <sup>10</sup>                                                                                                                    |
| MtHsp70           | mouse          | 1:400                       | Thermo Fisher Scientific (MA3-028; JG1)                                                                                          |
| Myc               | mouse          | 1:1 000                     | Cell Signalling Technology (2276S; 9B11)                                                                                         |
| Myc               | goat           | 1:2 000                     | Abcam (ab9132)                                                                                                                   |
| Cog3              | mouse          | 1:1 000                     | Dr. Vladimir Lupashin, University of Arkansas for Medical Sciences, AR                                                           |
| AP-1              | mouse          | 1:200                       | Thermo Fisher Scientific (MA1-25066; clone 100/3)                                                                                |
| His               | rabbit         | 1:1 000                     | Abcam (ab9108)                                                                                                                   |
| HA                | rat            | 1:1 000                     | Sigma (11867423001; clone 3F10)                                                                                                  |
| ZFPL1             | sheep          | 1:200                       | <sup>11</sup>                                                                                                                    |
| Giantin           | rabbit         | 1:400                       | Dr. Manfred Renz, Institute of Immunology and Molecular Genetics, Karlsruhe, Germany                                             |
| GORAB             | rabbit         | WB: 1:500                   | Proteintech (17798-1-AP)                                                                                                         |
| GORAB             | rabbit         | IF: 1:250                   | raised against human GORAB by injecting an N-terminal GST-tagged GORAB fragments (amino acids 1-130 and 301-369) into rabbit and |
| GORAB             | sheep          | IF: 1:250                   | sheep, respectively (conducted by the Scottish National Blood Transfusion Service, Edinburgh, United Kingdom)                    |

<sup>1</sup> IF – immunofluorescence, WB – western blotting

**Supplementary Table 3. List of primers used in this study.**

| <b>Name</b>        | <b>Sequence</b>                            |
|--------------------|--------------------------------------------|
| GORABclone_F       | TGCGAGATTTGGGCACTT                         |
| GORABclone_R       | AGGGCATGATCTACTGCA                         |
| GORAB131_XhoI_F    | CCGCTCGAGTGCAAATTTGGAGAAAAG                |
| GORAB130_NotI_R    | ATAAGAATGCGGCCGCTCAATCTGGCTTTGGAGGTAG      |
| GORAB369_NotI_R    | ATAAGAATGCGGCCGCTCATGTGGCCAAAGCAGCTGA      |
| GORAB130_HindIII_R | CCCAAGCTTTCAATCTGGCTTTGGAGGTAG             |
| GORAB300_HindIII_R | CCCAAGCTTTCAATCTACTTCTTGTTC                |
| GORAB369_HindIII_R | CCCAAGCTTTCAATGTGGCCAAAGCAGCTGA            |
| GORAB301_XhoI_F    | CCGCTCGAGAGGAGACCAGTGGTTCGT                |
| GORAB_XhoI_F       | GATCCTCGAGATGGCGCAAGGTTGG                  |
| Scyl1_Y2H_F        | GATCCATATGATGTGGTTCTTTGCCCGGGACCC          |
| Scyl1_Y2H_R        | GATCGAATTCTCAGTCCAGCTTCCGGGCTCCC           |
| Scyl1_GFP-C1_F     | GATCGAATTCTATGTGGTTCTTTGCCCGGGA            |
| Scyl1_GFP-C1_R     | GATCGGTACCTCAGTCCAGCTTCCGGGC               |
| Scyl1_NcoI_F       | GATCCCATGGATTGGTTCTTTGCCCGGGACCC           |
| Scyl1_348_R        | GATCGGTACCTCACTGCTGATACTCCTCAGCGCTC        |
| Scyl1_750R         | CAGTGGTACCTCACGGCTGGGTGCTGGGAC             |
| Scyl1_349_F        | GATCGAATTCTAAGATCATCCCTGTGGTGGTCAAG        |
| Scyl1_547_F        | GATCGAATTCTCTGGAGGAAGTGGAGAAGGATG          |
| Scyl1_MBP_F        | GATCGAATTCATGTGGTTCTTTGCCCGGGA             |
| Scyl1_MBP_R        | GATCTCTAGATCAGTCCAGCTTCCGGGCT              |
| Arf3_GST_F         | GATCGGATCCAAGAAGGAGATGCGCATC               |
| Arf3_GST_R         | GATCCTCGAGTCACTTCTTGTTTTGGAGCTGATTG        |
| Arf4_GST_F         | GATCGGATCCAAGAAGCAGATGCGCA                 |
| Arf4_GST_R         | GATCCTCGAGTTAACGTTTTGAAAGCTCATTTGAC        |
| Arf5_GST_F         | GATCGGATCCAAGAAGCAGATGCGGA                 |
| Arf5_GST_R         | GATCCTCGAGTTAGCGCTTTGACAGCTC               |
| Arf1_His_F         | GATCGAATTCATGGGGAACATCTTCGCC               |
| Arf1_His_R         | GATCCTCGAGCTTCTGGTTCCGGAGCTG               |
| Arf1_Q71L_mut_F    | GGACGTGGGTGGCTTGGACAAGATCCGGCC             |
| Arf1_Q71L_mut_R    | GGCCGGATCTTGTCCAAGCCACCCACGTCC             |
| Arf1_T31N_mut_F    | GGATGCTGCAGGGAAGAACACGATCCTCTACAAGCTTAAGC  |
| Arf1_T31N_mut_R    | GCTTAAGCTTGTAGAGGATCGTGTTCCTCCTGCAGCATCC   |
| GORAB_F8Lmut_F     | CAAGGTTGGGCAGGCTTGTCTGAGGAGGAAGTGG         |
| GORAB_F8Lmut_R     | CTCAGTTCCTCCTCAGACAAGCCTGCCAACCTTG         |
| GORAB_K190delmut_F | CCATGAAACTAAAGCGGATCCAGGAGTTGCAGGCTTTAGATG |
| GORAB_K190delmut_R | CATCTAAAGCCTGCAACTCCTGGATCCGCTTTAGTTTCATGG |
| Arf1_HA_F          | GATCGGATCCATGGGGAACATCTTCGCCAACCTC         |
| Arf1_HA_R          | GATCCCGCGGCCGCTTCTGGTTCCGGAGCTGATTGGACAGC  |
| Scyl3_GFP_F        | GATCCTCGAGAGATCTGCTTGGCTTTGAG              |
| Scyl3_GFP_R        | GATCGGATCCCAGTTATTATCTTCCCAG               |

## Supplementary references

- 1 Liu, S. C., Lane, W. S. & Lienhard, G. E. Cloning and preliminary characterization of a 105 kDa protein with an N-terminal kinase-like domain. *Biochim Biophys Acta* **1517**, 148-152 (2000).
- 2 Diao, A., Rahman, D., Pappin, D. J., Lucocq, J. & Lowe, M. The coiled-coil membrane protein golgin-84 is a novel rab effector required for Golgi ribbon formation. *J Cell Biol* **160**, 201-212, doi:10.1083/jcb.200207045 (2003).
- 3 Nakamura, N., Lowe, M., Levine, T. P., Rabouille, C. & Warren, G. The vesicle docking protein p115 binds GM130, a cis-Golgi matrix protein, in a mitotically regulated manner. *Cell* **89**, 445-455 (1997).
- 4 Pepperkok, R. *et al.* Beta-COP is essential for biosynthetic membrane transport from the endoplasmic reticulum to the Golgi complex in vivo. *Cell* **74**, 71-82 (1993).
- 5 Palmer, D. J., Helms, J. B., Beckers, C. J., Orci, L. & Rothman, J. E. Binding of coatamer to Golgi membranes requires ADP-ribosylation factor. *J Biol Chem* **268**, 12083-12089 (1993).
- 6 Pavel, J., Harter, C. & Wieland, F. T. Reversible dissociation of coatamer: functional characterization of a beta/delta-coat protein subcomplex. *Proc Natl Acad Sci U S A* **95**, 2140-2145 (1998).
- 7 Faulstich, D. *et al.* Architecture of coatamer: molecular characterization of delta-COP and protein interactions within the complex. *J Cell Biol* **135**, 53-61 (1996).
- 8 Hara-Kuge, S. *et al.* En bloc incorporation of coatamer subunits during the assembly of COP-coated vesicles. *J Cell Biol* **124**, 883-892 (1994).
- 9 Reinhard, C., Schweikert, M., Wieland, F. T. & Nickel, W. Functional reconstitution of COPI coat assembly and disassembly using chemically defined components. *Proc Natl Acad Sci U S A* **100**, 8253-8257, doi:10.1073/pnas.1432391100 (2003).
- 10 Hyvola, N. *et al.* Membrane targeting and activation of the Lowe syndrome protein OCRL1 by rab GTPases. *EMBO J* **25**, 3750-3761, doi:10.1038/sj.emboj.7601274 (2006).
- 11 Chiu, C. F. *et al.* ZFPL1, a novel ring finger protein required for cis-Golgi integrity and efficient ER-to-Golgi transport. *EMBO J* **27**, 934-947, doi:10.1038/emboj.2008.40 (2008).
